# Supplementary material for: <span data-contrast="auto">Hearing Aids Reduce Self-Perceived Difficulties in Noise for Listeners with Normal Audiograms <span data-ccp-props="{">
Source: Preprints.org preprint supplement (doi:10.20944/preprints202302.0035.v1), 2023-02-02
Supplement: Supplementary file 1 [file supplementary]

## Sheet: Supplementary S1-Processed data
DEMOGRAPHICS						PRE-INTERVENTION: HEARING CHARACTERISATION								AUDIOGRAM																						PRE-INTERVENTION: SSQ					POST-INTERVENTION: End-of-study questionnaire					POST-INTERVENTION 1: SADL
Participant ID	Group	Publication ID	Gender	Age	Is English your main language?	Do you notice any problems with your hearing?	Please describe the problems you notice with your hearing:	Do other people notice any problems with your hearing?	Please describe the problems others notice with your hearing:	Do you have difficulty hearing speech in noisy environments?	What environments do you have trouble hearing speech in?	Have you seen an audiologist about your hearing difficulties?	Were you offered a device or treatment option(s)?	PTA left 250 Hz	PTA left 500 Hz	PTA left 1000 Hz	PTA left 2000 Hz	PTA left 4000 Hz	PTA left 8000 Hz	PTA left 9000 Hz	PTA left 10000 Hz	PTA left 11200 Hz	PTA left 12500 Hz	PTA left 4FAHL	PTA right 250 Hz	PTA right 500 Hz	PTA right 1000 Hz	PTA right 2000 Hz	PTA right 4000 Hz	PTA right 8000 Hz	PTA right 9000 Hz	PTA right 10000 Hz	PTA right 11200 Hz	PTA right 12500 Hz	PTA right 4FAHL	You are talking with one other person and there is a TV on in the same room. Without turning the TV down, can you follow what the person you're talking to says?	You are listening to someone talking to you, while at the same time trying to follow the news on TV. Can you follow what both people are saying?	You are in conversation with one person in a room where there are many other people talking. Can you follow what the person you are talking to is saying?	You are in a group of about five people in a busy restaurant. You can see everyone else in the group. Can you follow the conversation?	You are with a group and the conversation switches from one person to another. Can you easily follow the conversation without missing the start of what each new speaker is saying?	What are the positives of the hearing aids?	What are the negatives of the hearing aids?	Would you continue with the hearing aids? Why/why not?	Would you purchase the hearing aids (cost $5000)? Why/why not?	Do you have any other comments?	Compared to using no hearing aid at all, do your hearing aids help you understand the people you speak with most frequently?	Are you frustrated when your hearing aids pick up sounds that keep you from hearing what you want to hear?	Are you convinced that obtaining your hearing aids was in your best interests?	Do you think people notice your hearing difficulties more when you wear your hearing aids?
3	C	C01	Male	54	Yes	Yes	hearing in noisy situations and higher frequencies	Yes	wife and daughters notice hearing issues	Yes	cafes, meeting rooms, conferences with hard floors	Yes	No	5	5	10	5	5	25	50	50	60	100	6.25	5	5	5	10	10	20	55	65	75	100	7.5	8	8	5	5	5	None, alas!	No improved hearing on any occasion, but some slight distortion in some situations	No	No - I'm not using them now, and they're free!		0	4	0	3
4	C	C02	Male	56	Yes	No		No		Yes	night club/bar, English spoken by people for who English is not a 'first language'.	No		-5	0	10	10	15	15	15	15	20	55	8.75	5	10	15	10	15	10	25	30	45	55	12.5	7	4	5	4	10	I found little benefit to wearing the hearing aids.	I sensed an occasional hum in the left hearing aid, and some times a hair rustling noise in both hearing aids.	No. Unnoticeable benefit, for the slight administrative burden (fitting / removal, turning on / off, battery change)	No. See above.		0	1	0	1
10	C	C03	Female	29	No	No		No		Yes	Concerts or really noisy environments.	No		5	5	5	0	0	-5	0	5	0	5	2.5	5	5	5	0	5	5	5	-5	-5	0	3.75	8	8	5	6	7	Sounds are amplified.	The device is felt in the ear and after a while it starts to hurt.	No, I consider that I would only use this type of device if my hearing was completely limited.	No, they are very expensive and I do not consider that they are completely necessary in my case.	No	2	3	1	5
15	C	C04	Female	52	No	Yes	Difficulty with following conversations in noisy places	No		Yes	Meetings with several cross conversations, people with their back to me in lecture rooms and noisy places	Yes	No	10	10	15	15	10	10	10	10	15	25	12.5	10	10	15	15	10	20	15	15	10	5	12.5	6	0	7	3	4	They are comfortable to wear and store.	They don't make a change to my hearing.	No, they don't really help.	No. I don't feel any improvement in my hearing ability.	I don't know if I am in the test or control group but it feels as if my hearing aids are not making any difference. They are also not interfering with my hearing.	0	0	0	0
16	C	C05	Male	44	Yes	Yes	sometimes do not hear clearly	Yes	sometimes do not hear clearly	Yes	background noise too loud	No		10	0	5	5	0	0	30	35	50	55	2.5	0	0	10	10	5	25	30	40	55	55	6.25	7	7	7	7	7	Louder	Background ground noise too loud Can be irritating	No	No	Batteries do not last very long	3	5	4	3
18	C	C06	Female	31	Yes	Yes	high pitched ping on occasion difficulty hearing in a noisy environment	Yes	they often have to repeat themselves	Yes	bars, shops, anywhere with a large amount of background noise	No		0	0	5	0	5	20	10	15	25	25	2.5	0	5	5	0	5	20	20	35	30	30	3.75	4	3	4	5	6	Clearer sound	slightly uncomfortable	Perhaps, as they make hearing the conversation in noisy environemnts easier.	No, my hearing is actually quite good, so they would not be necessary for another couple of decades at least.	nil	1	0	1	0
19	C	C07	Male	33	Yes	Yes	Difficulty understanding fast speech in noisy environments	Yes	When there are loud noises (e.g TV is on at home and my wife is talking to me). Not severe, but noticeable.	Yes	TV at home, a train / bus, noisy office chatter	No		5	10	10	5	5	5	25	10	5	10	7.5	5	10	10	15	10	-5	5	10	5	10	11.25	6	5	7	8	9	Very small, comfortable after a while	I sometimes do not know if they are working or not, could be that the volume is not high	I fear that I will lose them, and also same with contact lenses, I feel that it may prevent me from doing active things	The cost is quite high, and I perceive them as items I can easily misplace or break	N/A	2	5	2	2
20	C	C08	Female	63	Yes	Yes	hearing conversation in noisy environments	Yes	they notice that I cannot hear them	Yes	restaurants tutorials	No		15	10	10	0	20	25	40	45	60	70	10	10	15	5	0	15	20	35	50	60	70	11.25	3	6	3	2	8	Hearing conversation and tv better	Makes you look old to the young	Yes but not all the time. Only as needed.	Too expensive for me. Not enough gain for the expense	No	5	1	5	5
23	C	C09	Female	47	Yes	Yes	don't hear well in crowded noisey situations, don't always hear my husband! cant hear the voices on the tv sometimes	Yes	my husband complains I don't pay attention	Yes	reataurants or pubs	No		5	10	15	15	5	15	35	65	65	100	12.5	5	10	15	5	0	10	30	40	65	75	7.5	9	3	8	2	9	Not really sure. Maybe I could hear people better	Can't wear with sunglasses or glasses without rubbing and soreness. People can see I'm wearing them	Maybe if I was in certain situations, like a noisy bar	Not. I'm not convinced they helped me.	I would like feedback on what you think my problem is	1	0	1	1
33	C	C10	Male	33	Yes	No		No		Yes	Cafe busy work settings	No		5	5	15	15	30	0	5	0	10	10	16.25	5	10	10	25	25	10	0	-5	5	15	15	7	5	7	7	8	They are easy to put on and relatively discreet.	Sometimes they can pop out of my ear at the beginning	No, i don't feel it has been a distinctive change enough for me....	No as per the above	nil	2	3	2	3
34	C	C11	Female	45	Yes	Yes	Struggle to hear people some days, really need to concentrate.	Unsure		Yes	Back ground noises block out what i am meant to be hearing	No		15	15	15	5	5	25	30	40	45	55	10	10	10	15	15	10	20	15	25	30	40	12.5	3	3	3	5	5	Clarity in hearing when in groups	Nil	To continue having clear hearing	I currently would not be able to afford that		4	0	1	0
42	C	C12	Female	33	Yes	Yes	When I am at work and have to answer the phone I struggle to hear what the person on the line is saying as machines constantly beep in the background.	Yes	Only my husband because I usually can't understand him when he calls me using his speaker phone.	Yes	Any random chatter in the background. Mostly when I am on the phone though as I am missing visual cues to help me understand the person.	No		0	-5	5	5	0	-5	10	5	0	0	1.25	0	0	10	5	5	5	0	-5	-5	-5	3.75	7	2	5	6	6	I felt like I could understand people better in noisy environments.	The hearing aids were uncomfortable to wear. Some noises were louder than usual which was a bit irritating especially when my long hair brushed against the microphone of the hearing aid.	I would consider it if my hearing loss would get a lot worse, but at this stage the cons outweigh pros.	Not at this stage as it is too expensive. But I would if my hearing would seriously impact my ability to work.		5	5	3	1
47	C	C13	Female	32	No	No		No		Yes	Restaurant; shopping center	No		10	15	15	15	15	15	15	20	20	10	15	10	15	15	15	20	15	10	15	10	10	16.25	5	5	4	4	4	First, it is very easy to wear and take off. Also, the design is very friendly, since my friend did not notice I was wearing the hearing aid when we were shopping in Woolworth. Last but not the least, it did not affect my normal conversation with my friend when I wear it.	The part that is inserted into the ear is very sharp and narrow. A little carelessness can easily damage the ear. Also, after turning on the headset, there is some small noise.	No, after wearing the earphone five times, my hearing ability has not improved much.	No, too much.	No	5	5	2	2
50	C	C14	Female	19	Yes	Yes	Having to ask people to repeat themselves	Yes	They have to repeat themselves	Yes	Places where sound is coming from all around e.g food court, train	No		0	-5	5	5	5	-5	5	5	5	5	2.5	-5	0	5	5	5	-5	0	0	0	-10	3.75	5	2	3	3	5	makes things louder	kind of feel like I lose some of the background sounds? it's not a problem just disconcerting	Yes I would- they help me feel confident in conversations (e.g. I had a job interview at a cafe and I felt more confident wearing them)	as I am a student that would be out of my price range		3	4	4	2
2	E	E01	Female	49	Yes	No		No		Yes	Noisy bars/restaurants - usually places with lots of hard surfaces are the worst	No		10	5	15	10	20	30	50	60	65	65	12.5	5	10	15	10	15	25	30	50	60	70	12.5	10	0	5	5	5	I only got to use it once but it really helped me hear better in a very noisy environment	Not really worn it long enough to know	I think so yes for situations like the one I got to use it in	Erm, not at the moment - my hearing issues are not that restrictive to justify the cost	No	0	0	3	0
8	E	E02	Male	38	Yes	Yes	Difficult to hear in close range conversations in noisy environments.	Yes	Need to repeat	Yes	Noisy indoor venues	No		0	0	5	5	10	25	35	35	45	45	5	0	0	10	5	15	5	20	25	20	40	7.5	8	7	6	5	8	Improving hearing	Uncomfortable	Yes but it does appear to have improved my condition	No because the improvement is not considered dramatic to a satisfactory level		2	6	2	0
11	E	E03	Female	51	Yes	Yes	Difficulty hearing speech in noisy environments	Yes	My partner has to repeat what he said so I can hear him	Yes	restaurants, cafes, traffic, shops	No		10	10	10	5	15	35	55	55	70	75	10	10	5	10	10	20	25	45	30	50	60	11.25	7	3	8	6	8	The look quite discreet and might help me to hear better	I'm not in the habit of wearing them so don't have them on when a situation arises that they could help with	No because I don't think I need them at this stage and they're a bit awkward (slightly itchy, tickly and make it harder to change glasses especially if also wearing a mask and earrings). I don't like hearing myself eat.	No because that's a lot of money and I don't think I need hearing aids yet	Not at this stage	1	2	0	0
12	E	E04	Male	31	Yes	No		No		Yes	crowds, when there are multiple sources of speech i.e. tv news broadcast and conversation at same volume, sustained noisy environments i.e. a loud engine running nearby	No		15	15	10	10	20	15	10	10	20	45	13.75	10	10	5	0	15	0	10	15	10	30	10	3	5	4	7	6	Increased clarity of speech from people in front of me, with a reduction in majority of background noise. When in a quiet environment, I felt like I had 'super hearing' so had to put less effort in to listening for speech etc	At times, and in complex environments, I found the hearing aids might 'tune in' to the wrong thing. I would be listening to someone speak, then another sound or conversation nearby would take precedence. Certain Hugh frequency sounds like bus brakes, squeaky door hinges would be amplified (compared to my normal, unaided hearing) which was uncomfortable. For me, directionality was something I had …	Currently, I would only want to wear the hearing aids in particular, controlled environments where there may need to be a lot of listening or conversation - this would help reduce fatigue/frustration.	At a cost of $5000 I would personally not be investing in hearing aids as I find my unaided hearing to work well, even if I sometimes struggle in a noisy environment to understand speech clearly.	I found inserting the hearing aids very challenging - I appreciate that I have never worn them before, but compared to normal earbuds or in-ear earphones, I had to work quite hard at ensuring the tips were at the right angle and correctly inserted i.e. deep enough.	3	5		0
13	E	E05	Male	57	Yes	Yes	Hard to hear conversation in noisy places	Yes	They notice that I have a hard to hear conversation in noisy places. They report I sometimes become withdrawn from the group.	Yes	restaurants with hard surfaces bars where there is lots of background music	Yes	No	15	5	5	10	25	5	25	25	45	75	11.25	15	10	5	10	35	10	25	25	40	100	15	9	6	8	3	8	Great amplification of sounds that helped my hearing in noisy places	didn;t compleletly fix the problem as above. Sl unconfortable to use sometimes	Yes, would be a useful option to have when going into noisy social/talking envs	No, too much money!	Many thanks for the chance to do this trial!	5	1	4	0
14	E	E06	Male	39	Yes	No		Unsure		Yes	In busy pubs/restaurants with music, or concerts.	No		0	0	10	20	25	15	10	15	20	25	13.75	5	10	15	20	25	10	10	15	25	25	17.5	7	6	7	6	7	It helps reducing noise and hearing useful sounds clearly.	The feeling of wearing it inside the ear, is slightly itchy and awkward. Also with the current COVID safety situation, hearing aids easily tangle with the straps of face mask, causing them to fall easily when the face mask needs to be removed for any reason.	Not at this stage. I am still able to moderately participate in conversations in a noisy situation. Carrying and wearing the hearing aid, still feels a hassle comparing the advantage I am getting. Though in future, when my hearing abilities weaken further, I will surely consider using hearing aids.	I will not purchase it, with my current hearing conditions. The price is quite costly for the benefit it provides at this stage for me. In future, when my hearing abilities deteriorate, I will probably find it worthwhile purchasing for $5000.	When I wear the device, I feel a bit itchy from the earbuds, that often caused me a little coughing at the beginning of wearing them.	3	1	4	0
17	E	E07	Female	47	Yes	Yes		No		Yes	In the kitchen when the kettle is on At restaurants if there is a lot of background noise	No		5	5	5	0	10	10	15	15	20	15	5	10	10	15	10	10	5	15	10	0	5	11.25	7	5	6	7	6	Clarity of sound, enables better engagement, easy to use and store.	Sometimes uncomfortable	Yes I would in social situations. It makes engaging in conversations easier.	No. Too expensive relative to need.	No	4	0	4	2
22	E	E08	Female	31	Yes	Yes	When in noisy environments I have difficulty hearing conversations.	Yes	When I am out with others they notice that I have trouble hearing them in loud areas	Yes	Any venue where there is a lot of noise, music, and conversations.	No		5	0	10	5	5	5	5	-10	0	5	5	5	5	10	10	5	5	5	0	-10	0	7.5	8	7	2	1	0	They helped with my ability to hear and participate in conversations while in loud/ noisy environments.	The only negative I found was that there was a bit of feedback when near speaker systems or loud music.	Yes. The benefit that I gain from them is too great to not use them.	At this point, I could not afford the $5000 as I am a student with a part-time job. If I could get them paid for through insurance then I would definitely get them.	I would be very interested in getting a hearing aid in the future as a result of this study.	6	0	6	1
25	E	E09	Female	37	Yes	Yes	only in crowded spaces, sometimes difficult to hear words	No		Yes	a room full of conversations	No		5	0	5	5	10	5	20	15	10	20	4	10	5	0	5	10	10	20	15	10	35	4	7	6	2	3	6
28	E	E10	Female	33	No	No		No		Yes	morning teas with whole department, conference dinners, conference poster sessions	No		0	0	0	5	-5	-10	10	5	0	-10	0	0	0	0	5	0	-5	5	0	-10	5	1.25	9	6	6	6	5	I feel like the device has improved the speech to random noise ratio if that description makes sense. Generally the device amplifies the speakers so they are easier to understand and don't get lost as easily in surrounding noises.	There are very individual noises from the background that can be very amplified and distract. This has been very rare though. An example was a cafe situation that had an indoor fountain the sound of flowing water was louder than without the device. Other examples are like when a cup was put down loudly onto a table or plate than that was also amplified in some situations. But again these were all…	I am not sure as they did lep in many situations but the amount of benefit was not super high. While I may not wear them on a very regular basis I think I would def wear them to particularly noisy situations like a conference poster session.	Not for that price.		4	5	6	2
38	E	E11	Female	68	Yes	Yes	Difficult to hear in noise situations	Yes	That I sometimes appear not to hear them	Yes	Public transport, cafes, restaurants, crowded public spaces	Yes	No	10	15	15	5	25	40	60	60	70	70	15	15	20	20	20	25	35	70	70	70	75	21.25	5		3	4	8
41	E	E12	Female	50	Yes	Yes	difficulty understanding what people are saying if I can't see their lips especially in environments where there are competing noises	Yes	they have said I say "what?" often and ask them to repeat what they have said	Yes	restaurants, noisy classrooms, school playground, busy staff rooms	Yes	No	5	10	10	10	10	5	15	15	15	20	10	5	0	5	5	5	5	20	15	15	25	3.75	2	0	2	1	1	I was able to hear more of what my conversation partners were saying.	Because I wasn't wearing the hearing aids all the time I frequently forgot to put take hem/put them on when I was in a noisy environment.	I don't think so because there were times when some of the other sounds were also amplified and felt uncomfortable.	I don't think so because I am more used to using other strategies to help me like lip-reading and because I don't think I used the HAs enough to really get the sense if there being more benefit than annoyance.		2	4	3	1
43	E	E13	Male	52	Yes	Yes	difficulty in hearing with background noise	Yes	difficulty in having conversations in noisy areas	Yes	restaurants & shopping centres	No		0	0	0	20	15	25	30	45	60	75	8.75	0	5	5	20	25	30	25	75	75	100	13.75	5	2	2	2	1	I can hear conversations much clearer	Loud back ground noise (like cicadas or shopping centres) is now uncomfortable	Yes, in some circumstances. (See above re background noise)	Probably not if they cost $5,000. If my hearing deteriorated significantly then I would reconsider this decision.	Hearing aids very comfortable to wear. Increase in volume of conversation and general day to day noise took some getting used to.	5	5	4	5
[truncated: 13 more columns]

## Sheet: Supplementary S2
					ACOUSTIC MEASURES																ONLY IN PHASE II - POST INTERVENTION (blue rows)
Participant	Group	Date	Time	Phase	Ho	spectFlatness	SS	ZCR	Em	Cepst	dB-Average A-Level	Q1: Are you wearing your device?	Q2: Where are you?	Q3: How noisy is the venue?	Q4: How many people are in your group, including you?	Q5: How demanding is it to listen to the talker(s)?	Q6: How much of the other talker(s)'s displayed at bottom	Q7: How well are you able to participate in the conversation?	Q8: How frustrated do you feel right now?	Q9: How would you rate your mood right now?	volume	quality	benefit	satisfied
				Phase 1 meaning pre-intervention, and phase 2 meaning post-intervention							Calibrated	wearingdevice	location	noisy	count: (1) 2 ppl, (1) 3-6 ppl, (3) >6 ppl	demanding	understand	participation	frustrated	mood
2	E	2020-12-16		1	-4.39153	0.0142319	19.2425	19.1044	3.1396	-2.23329	82.3935	No	Bar/pub	Very	3	Moderately	Most of it	Moderately	Moderately	Happy
2	E	2020-02-18		1	-1.75597	0.0032642	3.15832	5.21419	2.86496	-3.72439	46.6475	No	Other	Moderately	2	Not at all	Most of it	Not at all	Extremely	Neutral
2	E	2021-01-17		2	-4.58879	0.0204185	26.8836	24.9392	3.64662	-2.14552	84.3419	Yes	Bar/pub	Extremely	3	Moderately	Most of it	Very	Moderately	Happy	Comfortable	Ok	Very good	Extremely
3	C	2020-03-03	00:14:40.270000	1								No	Cafe/restaurant	Moderately	1	Very	Most of it	Moderately	Moderately	Happy
3	C	2020-03-04	00:19:22.200000	1								No	Other	Moderately	3	Very	Most of it	Moderately	Moderately	Neutral
3	C	2020-03-05	00:11:44.220000	1								No	Cafe/restaurant	Moderately	2	Moderately	Most of it	Very	A little	Happy
3	C	2020-03-05	00:15:44.430000	1								No	Other	A little	2	Moderately	All of it	Extremely	A little	Happy
3	C	2020-03-11	00:19:09.330000	1								No	Other	Moderately	1	A little	Most of it	Very	A little	Happy
3	C	2020-03-12	00:19:44.380000	1								No	Other	Moderately	1	A little	All of it	Extremely	Not at all	Very happy
3	C	2020-03-14	00:12:40.060000	1								No	Cafe/restaurant	Moderately	1	A little	All of it	Extremely	Not at all	Very happy
3	C	2020-03-14	00:14:45.240000	1								No	Cafe/restaurant	Moderately	1	Not at all	All of it	Extremely	Not at all	Very happy
3	C	2020-10-07	00:19:22.290000	2	-4.152	0.01457	20.438	19.7813	2.744		57.25	Yes	Party or gathering at a home	Moderately	1	Not at all	All of it	Extremely	Not at all	Very happy	Very soft	Very poor	Very poor	Not at all
3	C	2020-10-08	00:08:22.280000	2	-2.385	0.00143	4.797	4.739	1.434		56.5	Yes	Party or gathering at a home	Very	1	Extremely	A little	A little	Moderately	Sad	Very soft	Very poor	Very poor	Not at all
3	C	2020-10-17	00:20:39.330000	2	-3.4048	0.02218	14.454	14.664	4.214		54.49	Yes	Party or gathering at a home	A little	1	A little	All of it	Very	Not at all	Very happy	Very soft	Very poor	Very poor	Not at all
3	C	2020-10-23	00:18:37.540000	2	-3.932	0.01152	13.109	14.072	2.602		74.78	Yes	Cafe/restaurant	Very	1	Very	Most of it	Moderately	Moderately	Neutral	Very soft	Poor	Very poor	Not at all
3	C	2020-10-30	00:18:48.360000	2	-4.0289	0.00818	16.657	15.964	3.19		75.37	Yes	Cafe/restaurant	Moderately	2	Moderately	All of it	Extremely	Not at all	Very happy	Very soft	Very poor	Very poor	Not at all
4	C	2020-03-15		1								No	Other	Moderately	1	Very	About half	Moderately	Moderately	Neutral
4	C	2020-02-19		1								No	Other	Not at all	1	Not at all	All of it	Extremely	Not at all	Very happy
4	C	2020-02-20		1								No	Other	Very	2	Very	Most of it	Moderately	Moderately	Happy
4	C	2020-10-17	1:14pm	2								Yes	Other	Very	1	Extremely	Most of it	Moderately	Moderately	Happy	Loud but ok	Very good	Ok	A little
4	C	2020-10-17	1:20pm	2								Yes	Other	Extremely	1	Extremely	Most of it	Moderately	A little	Happy	Loud but ok	Ok	Ok	Not at all
4	C	2020-10-17	1:31pm	2								Yes	Other	Extremely	1	Extremely	Most of it	Moderately	A little	Happy	Loud but ok	Ok	Ok	Not at all
5	E	2020-03-02		1	-3.38629	0.0231479	19.956	22.9225	4.64261	-3.23629	46.8206	No	Café/restaurant	Moderately	1	Moderately	About half	Moderately	Moderately	Neutral
5	E	2020-03-15		1	-3.27928	0.00384073	8.19475	11.1132	3.37579	-3.33077	63.8653	No	Café/restaurant	A little	1	A little	Most of it	Very	A little	Happy
5	E	2020-07-14		1	-3.00545	0.0162459	10.0958	14.9801	3.2886	-3.81825	47.1115	No	Café/restaurant	A little	1	A little	About half	Moderately	A little	Happy
5	E	2020-07-18		1	-3.98984	0.00970587	18.5993	18.3591	4.92299	-2.529	80.5652	No	Café/restaurant	Moderately	1	Moderately	About half	Very	Very	Very happy
5	E	2020-07-24		1	-1.32057	0.00173047	2.23037	3.42833	3.71655	-3.90779	47.3983	No	Other	Moderately	3	Moderately	About half	Moderately	Moderately	Neutral
5	E	2020-08-01		1	-3.77744	0.0040099	11.5982	11.8082	3.15869	-2.95281	73.6899	No	Bar/pub	Very	1	Moderately	About half	Moderately	Moderately	Very happy
8	E	2020-09-28		1	-4.22608	0.0117063	22.637	21.6342	3.80505	-2.48775	81.62	No	Café/restaurant	Moderately	3	Moderately	Most of it	Moderately	A little	Happy
8	E	2020-10-09		1	-4.20453	0.0214805	20.6102	23.9114	2.76329	-2.33505	78.79	No	Bar/pub	Very	2	Very	A little	A little	Moderately	Neutral
8	E	2020-10-24		1	-2.28944	0.00305122	10.6056	13.4611	3.1139	-2.92903	71.27	No	Other	Very	3	Very	About half	Moderately	Moderately	Neutral
8	E	2020-11-04		1	-3.61431	0.0252111	17.0653	23.3129	2.70286	-2.74206	68.95	No	Café/restaurant	A little	1	A little	Most of it	Moderately	A little	Happy
8	E	2020-11-11		2	-4.70263	0.0202536	24.394	25.2677	2.77089	-2.1304	85.16	Yes	Bar/pub	Extremely	2	Very	About half	A little	Moderately	Happy	Loud but ok	Good	Ok	Moderately
8	E	2020-12-30		2	-4.39396	0.0178068	22.2496	26.0185	3.2142	-2.48945	77.87	Yes	Café/restaurant	Very	3	Very	Most of it	Moderately	Moderately	Happy	Comfortable but slightly loud	Ok	Ok	Moderately
8	E	2021-04-10	6:24pm	2	-4.42028	0.0243913	29.3177	29.7782	3.39578	-2.03829	86.86	Yes	Cafe/restaurant	Very	2	Very	About half	Moderately	A little	Happy	Loud but ok	Good	Ok	Moderately
8	E	2021-04-10	6:57pm	2	-4.9841	0.0320792	33.9287	33.6555	3.18232	-1.81111	90.45	Yes	Cafe/restaurant	Extremely	2	Very	A little	A little	Very	Neutral	Loud but ok	Good	Ok	Moderately
8	E	2021-04-18		2	-4.28864	0.0176111	22.6449	25.5825	3.37249	-2.14866	85.72	Yes	Cafe/restaurant	Very	3	Moderately	Most of it	Moderately	A little	Happy	Loud but ok	Good	Ok	Moderately
10	C	2020-03-04		1	-3.73181	0.0188098	12.9961	14.5724	2.71923	-1.71428	75.4133	No	Other	Very	2	Moderately	Most of it	Moderately	A little	Happy
10	C	2020-06-16		1	-3.59837	0.0409134	14.2547	16.2824	2.90451	-2.89119	51.3637	No	Party or gathering at a home	Moderately	2	Moderately	About half	Moderately	Moderately	Neutral
10	C	2020-07-22		1	-3.01563	0.00579428	5.81281	7.74889	2.53293		46.6749	No	Cafe/restaurant	Moderately	2	Moderately	Most of it	Moderately	Moderately	Neutral
11	E	2020-07-22		1	-2.508	0.00644	4.442	5.694	2.837		41.87	No	Shopping centre	Moderately	1	Moderately	Most of it	Moderately	Moderately	Neutral
11	E	2020-07-30		1	-3.1621	0.00325	7.346	7.96	2.376		62.12	No	Other	Moderately	2	A little	Most of it	Extremely	Not at all	Happy
11	E	2020-07-30		1	-3.2118	0.00274	6.821	7.093	2.676		65.1	No	Other	Very	2	Very	About half	Moderately	Moderately	Neutral
11	E	2020-08-15		1	-4.278	0.02391	16.612	18.715	2.515		63.22	No	Party or gathering at a home	A little	2	Very	About half	A little	Very	Sad
11	E	2020-10-21		1	-4.4595	0.02998	20.227	21.358	2.794		64.9	No	Party or gathering at a home	A little	1	Moderately	Most of it	Moderately	A little	Neutral
11	E	2020-11-02		1	-3.8639	0.01744	10.996	14.563	2.637		59.19	No	Cafe/restaurant	A little	1	Not at all	All of it	Extremely	Not at all	Very happy
11	E	2020-12-12		2	-2.4469	0.00659	4.861	6.199	2.341		41.98	Yes	Party or gathering at a home	A little	1	Moderately	Most of it	Moderately	Moderately	Happy	Comfortable but slightly loud	Good	Ok	Moderately
11	E	2020-12-12		2	-4.5231	0.03581	21.913	23.203	2.858		69.25	Yes	Cafe/restaurant	Very	1	A little	All of it	Very	A little	Happy	Loud but ok	Good	Ok	Moderately
11	E	2020-12-15		2	-4.7435	0.03218	24.338	23.832	3.779		76.68	Yes	Party or gathering at a home	Very	1	Moderately	All of it	Extremely	A little	Neutral	Loud but ok	Very good	Ok	Moderately
11	E	2020-12-18		2	-2.9168	0.00948	9.464	11.289	2.723		55.02	Yes	Party or gathering at a home	Moderately	1	Very	Most of it	Moderately	Moderately	Happy	Comfortable but slightly loud	Ok	Poor	Not at all
11	E	2020-12-18		2	-5.2206	0.03349	26.03	25.622	2.57		72.72	Yes	Party or gathering at a home	Very	1	Moderately	All of it	Very	A little	Neutral	Loud but ok	Good	Ok	A little
12	E	2020-07-10	00:14:03.580000	1	-5.4755	0.00373	39.519	36.149	3.832		76.36	No	Shopping centre	Very	1	Very	About half	Moderately	Very	Sad
12	E	2020-07-14	00:22:39.370000	1	-5.0145	0.08446	38.434	35.699	3.935		66.9	No	Other	A little	2	A little	Most of it	Moderately	A little	Neutral
12	E	2020-08-05	00:22:16.040000	1	-3.443	0.0084	12.539	12.056	12.067		58.53	No	Other	Moderately	2	Very	About half	A little	Extremely	Sad
12	E	2020-08-12	00:21:48.230000	1	-3.6553	0.02306	23.665	24.655	3.022		55.8	No	Party or gathering at a home	Moderately	2	Moderately	Most of it	Moderately	Extremely	Very sad
12	E	2020-08-25	00:13:46.410000	1	-4.2645	0.02029	18.544	18.726	4.01		74.63	No	Cafe/restaurant	Very	2	Moderately	Most of it	Moderately	A little	Happy
12	E	2020-08-29	00:18:49.540000	1	-3.6007	0.02064	15.659	16.29	4.862		73.15	No	Party or gathering at a home	Moderately	2	A little	All of it	Extremely	Not at all	Very happy
12	E	2020-09-03	00:21:23.590000	1	-3.0023	0.00683	8.883	9.126	6.926		51.21	No	Party or gathering at a home	Very	1	Very	About half	Moderately	Very	Sad
12	E	2020-09-22	00:16:54.240000	1	-3.4176	0.00732	8.412	9.975	2.794		65.08	No	Shopping centre	Moderately	1	Not at all	All of it	Very	A little	Very happy
12	E	2020-09-25	00:21:19.420000	1	-3.003	0.01125	11.125	11.142	3.563		55.73	No	Party or gathering at a home	A little	1	A little	All of it	Extremely	A little	Happy
12	E	2020-10-01	00:19:14.300000	1	-2.3723	0.00053	3.711	3.678	2.986		67.5	No	Other	Moderately	1	Moderately	Most of it	Very	A little	Happy
12	E	2020-10-03	00:21:27.320000	1	-4.82	0.05887	37.139	36.427	3.82		55.85	No	Party or gathering at a home	A little	1	Not at all	All of it	Extremely	Not at all	Very happy
12	E	2020-10-29	00:14:22.570000	1	-3.3056	0.00318	13.273	11.709	4.011		61.85	No	Party or gathering at a home	Moderately	1	A little	Most of it	Very	A little	Very happy
12	E	2020-12-06	00:19:06.080000	2	-3.6549	0.03358	17.229	19.672	3.261		65.81	Yes	Party or gathering at a home	Moderately	2	Moderately	Most of it	Moderately	A little	Happy	Loud but ok	Ok	Ok	Moderately
12	E	2020-12-07	00:22:27.280000	1	-3.1988	0.00938	14.28	13.942	2.213		59.83	No	Party or gathering at a home	Very	2	Very	About half	Moderately	Extremely	Sad
12	E	2020-12-10	00:13:54.230000	2	-3.9702	0.00299	11.253	11.396	2.778		64.26	Yes	Shopping centre	Very	1	A little	All of it	Very	A little	Very happy	Comfortable	Good	Very good	Very
12	E	2020-12-10	00:14:06.170000	2	-4.3384	0.02118	15.904	15.547	2.724		66.78	Yes	Shopping centre	Very	2	Moderately	Most of it	Moderately	A little	Happy	Comfortable but slightly loud	Ok	Ok	Moderately
12	E	2020-12-11	00:21:36.380000	1	-4.0437	0.01478	17.16	17.736	3.13		84	No	Bar/pub	Extremely	3	Very	Most of it	Moderately	A little	Very happy
12	E	2020-12-11	00:21:42.250000	2	-4.0821	2e-05	18.135	16.642	4.431		91.01	Yes	Bar/pub	Very	3	Very	A little	Moderately	Moderately	Happy	Comfortable but slightly loud	Poor	Poor	A little
12	E	2020-12-28	00:22:46.270000	1	-4.0547	0.03738	30.975	28.026	4.616		65	No	Other	Moderately	1	Very	About half	Moderately	Very	Very sad
12	E	2021-01-25	00:17:38.340000	1	-3.2051	0.004	6.834	7.873	2.99		70.83	No	Other	Very	1	Very	About half	A little	Moderately	Happy
12	E	2021-01-28	00:14:50.350000	1	-4.0173	0.00766	17.546	15.731	3.458		77.35	No	Other	Extremely	2	Very	About half	Moderately	Very	Neutral
13	E	2020-07-25	00:18:11.420000	1	-3.0431	0.02216	10.652	13.221	3.44		44.42	No	Party or gathering at a home	A little	2	A little	Most of it	Very	Not at all	Very happy
13	E	2020-07-25	00:20:13.520000	1	-3.4276	0.01361	18.313	17.624	5.028		56.39	No	Party or gathering at a home	Moderately	3	Moderately	Most of it	Moderately	A little	Neutral
13	E	2020-07-26	00:18:43.430000	1	-4.0313	0.01084	17.047	16.282	3.344		76.59	No	Cafe/restaurant	Very	2	Extremely	About half	Moderately	A little	Happy
13	E	2020-07-26	00:19:31.190000	1	-3.935	0.00834	15.106	14.51	2.976		72.81	No	Cafe/restaurant	Moderately	2	Very	About half	Moderately	A little	Happy
13	E	2020-09-24	00:08:35.390000	1	-2.4515	0.00652	4.739	6.78	4.48		68.21	No	Party or gathering at a home	A little	2	Very	Most of it	A little	Extremely	Happy
13	E	2020-10-29	00:15:01.280000	1	-3.465	0.00198	11.069	9.43	3.143		69.17	No	Other	Very	3	Very	About half	Moderately	Moderately	Neutral
13	E	2020-10-29	00:20:31.410000	1	-3.3821	0.03974	16.624	18.382	4.492		44.48	No	Party or gathering at a home	A little	2	A little	All of it	Very	Not at all	Very happy
13	E	2020-10-30	00:10:26	1	-4.2094	0.01914	17.697	17.252	3.628		76.1	No	Cafe/restaurant	Moderately	2	Moderately	Most of it	Moderately	A little	Happy
13	E	2020-11-07	00:06:48.180000	1	-5.0032	0.02037	24.064	22.642	2.79		80.88	No	Shopping centre	Very	1	Very	About half	Moderately	Moderately	Happy
13	E	2020-11-07	00:11:40.040000	2	-3.424	0.04452	11.476	17.455	2.361		36.95	Yes	Other	Not at all	1	Not at all	All of it	Extremely	Not at all	Very happy	Comfortable but slightly loud	Good	Very good	Very
13	E	2020-11-07	00:13:51.540000	2	-3.3672	0.00918	10.081	10.364	2.455		56.84	Yes	Party or gathering at a home	Moderately	2	Moderately	About half	Moderately	A little	Happy	Loud but ok	Good	Very good	Extremely
13	E	2020-11-08	00:13:03.460000	2	-3.7407	0.00831	9.682	10.794	1.511		52.03	Yes	Party or gathering at a home	Moderately	2	Moderately	Most of it	A little	A little	Happy	Loud but ok	Very good	Very good	Extremely
13	E	2020-11-08	00:13:16.290000	2	-4.1273	0.03456	17.295	20.011	2.784		54.47	Yes	Party or gathering at a home	Very	2	Moderately	All of it	Very	Not at all	Very happy	Loud but ok	Very good	Very good	Extremely
13	E	2020-11-10	00:16:08.390000	2	-3.8976	0.02624	27.499	25.767	4.758		59.21	Yes	Other	A little	2	Not at all	All of it	Extremely	Not at all	Very happy	Loud but ok	Very good	Very good	Extremely
13	E	2020-11-11	00:14:44.380000	2	-3.779	0.03884	16.042	18.986	3.479		45.34	Yes	Other	Moderately	1	A little	Most of it	Very	A little	Happy	Loud but ok	Very good	Very good	Extremely
13	E	2020-11-13	00:09:07.100000	2	-3.007	0.00523	7.265	9.43	2.648		55.66	Yes	Other	A little	3	Not at all	All of it	Very	Not at all	Very happy	Loud but ok	Very good	Very good	Extremely
13	E	2020-11-15	00:11:46.290000	2	-3.663	0.03181	11.226	14.989	4.916		43.1	Yes	Party or gathering at a home	Moderately	3	Moderately	Most of it	Very	A little	Very happy	Loud but ok	Very good	Very good	Extremely
13	E	2020-11-17	00:18:18.140000	2	-3.4176	0.02096	17.621	18.072	4.679		54.72	Yes	Other	A little	3	A little	All of it	Extremely	Not at all	Very happy	Loud but ok	Very good	Very good	Extremely
13	E	2020-11-20	00:23:03.540000	2	-4.8617	0.15968	30.049	36.4	2.581			Yes	Music venue	Very	3	Moderately	Most of it	Very	Not at all	Very happy	Loud but ok	Very good	Very good	Very
13	E	2020-11-22	00:21:46.490000	2	-3.2353	0.02816	9.319	13.154	2.435		39.7	Yes	Party or gathering at a home	A little	1	Not at all	All of it	Extremely	Not at all	Very happy	Loud but ok	Very good	Very good	Extremely
13	E	2020-11-25	00:17:03.290000	2	-3.9566	0.02967	11.367	14.549	2.914		43.57	Yes	Cafe/restaurant	Extremely	2	Moderately	Most of it	Moderately	Moderately	Happy	Loud but ok	Good	Good	Moderately
13	E	2020-11-27	00:20:36.550000	2	-3.1193	0.01739	8.238	10.869	2.649		44.22	Yes	Other	Very	3	Moderately	Most of it	Very	A little	Very happy	Loud but ok	Very good	Very good	Extremely
13	E	2020-11-27	00:23:04.350000	2	-2.2751	0.01372	4.974	7.191	1.537		37.23	Yes	Party or gathering at a home	Moderately	1	A little	All of it	Extremely	Not at all	Very happy	Loud but ok	Very good	Very good	Extremely
13	E	2020-12-02	00:22:10.470000	2	-2.7253	0.03801	9.568	12.916	1.84		36.53	Yes	Party or gathering at a home	Not at all	1	Not at all	All of it	Extremely	Not at all	Very happy	Loud but ok	Very good	Very good	Extremely
13	E	2020-12-03	00:18:18.490000	2	-3.8103	0.00387	14.471	12.814	2.988		82.32	Yes	Cafe/restaurant	Extremely	3	Extremely	Most of it	Moderately	Moderately	Very happy	Loud but ok	Very good	Very good	Very
13	E	2020-12-04	00:11:54.230000	2	-2.5713	0.00353	5.78	8.258	2.325		53.52	Yes	Other	A little	3	Not at all	All of it	Extremely	Not at all	Happy	Loud but ok	Very good	Very good	Extremely
13	E	2020-12-04	00:22:15.580000	2	-3.1696	0.03965	15.643	16.537	2.779		45.19	Yes	Music venue	Moderately	3	A little	All of it	Very	Not at all	Very happy	Loud but ok	Very good	Very good	Extremely
13	E	2020-12-09	00:14:17.160000	2	-3.8802	0.01863	9.895	11.816	2.938		44.89	Yes	Other	A little	1	Not at all	All of it	Extremely	Not at all	Very happy	Loud but ok	Very good	Very good	Extremely
14	E	2020-08-05		1	-4.24323	0.0118228	21.2231	23.8774	2.95702	-1.3707	72.0368	No	Bar/pub	Moderately	3	Moderately	Most of it	Moderately	A little	Happy
14	E	2020-08-17		1	-4.71625	0.0171944	25.0605	27.152	2.34561	-1.309	71.8254	No	Shopping centre	Moderately	1	Very	Most of it	Moderately	A little	Happy
14	E	2020-11-09	1:12pm	1	-3.80643	0.0156616	40.4784	37.3821	5.3056	-2.07367	59.8083	No	Party or gathering at a home	Moderately	2	Very	Most of it	Moderately	A little	Neutral
14	E	2020-11-09	1:49pm	1	-4.28308	0.013786	15.8938	20.0064	2.71835	-1.62913	64.9912	No	Other	Very	2	A little	About half	Moderately	A little	Happy
14	E	2020-11-09	1:58pm	1	-4.82386	0.0238406	30.3344	32.1018	2.7865	-1.15868	74.139	No	Cafe/restaurant	A little	3	Moderately	Most of it	Very	Not at all	Happy
14	E	2020-11-09	2:06pm	1	-5.15153	0.0342216	31.9497	33.9804	2.16462		75.7862	No	Shopping centre	Very	1	Moderately	Most of it	Moderately	A little	Neutral
14	E	2020-12-23	3:02pm	2	-6.35193	0.0729268	74.9467	66.8438	2.7109	-0.904862	74.9052	Yes	Other	Extremely	1	Moderately	Most of it	Moderately	Moderately	Happy	Uncomfortably loud	Good	Good	Moderately
14	E	2020-12-23	3:09pm	2	-5.21223	0.0402995	38.4157	40.4053	4.20749	-1.37678	67.1074	Yes	Other	Moderately	1	Moderately	Most of it	Very	A little	Happy	Comfortable	Good	Good	Moderately
14	E	2020-12-23	4:41pm	2	-5.10098	0.0296388	32.5881	36.2467	2.62346	-1.30279	69.5016	Yes	Shopping centre	Moderately	2	A little	Most of it	Very	Not at all	Happy	Comfortable but slightly loud	Good	Good	Moderately
14	E	2021-01-03	3:20pm	2	-5.01838	0.029559	40.0026	37.487	4.1993	-1.00303	78.5857	Yes	Shopping centre	Extremely	2	Moderately	Most of it	Moderately	A little	Neutral	Comfortable but slightly loud	Good	Ok	Moderately
14	E	2021-01-03	4:55pm	2	-3.9157	0.0107514	21.2137	20.544	4.17156	-2.37003	54.7502	Yes	Other	Moderately	2	Very	Most of it	Moderately	A little	Neutral	Comfortable	Good	Good	Very
14	E	2021-01-04	4:30pm	2	-4.96809	0.039614	37.7665	39.8179	2.48929	-1.35537	67.2175	Yes	Other	Extremely	1	Very	Most of it	Moderately	A little	Happy	Comfortable	Good	Ok	A little
15	C	2020-10-31	00:09:31.540000	1	-2.3519	0.00189	4.43	4.594	2.923		65.22	No	Other	Moderately	1	Moderately	All of it	Very	Not at all	Very happy
15	C	2020-10-31	00:11:29.450000	1	-5.1471	0.0119	23.324	22.704	2.462		77.75	No	Shopping centre	Very	2	Very	Most of it	Moderately	A little	Happy
15	C	2020-10-31	00:11:53.300000	1	-4.6756	0.01856	19.838	19.019	2.759		75.31	No	Shopping centre	Very	2	Very	About half	A little	Moderately	Neutral
15	C	2020-11-02	00:13:06.280000	1	-2.3438	0.00319	4.271	4.383	3.19		58.64	No	Cafe/restaurant	A little	1	Moderately	Most of it	Very	Moderately	Neutral
15	C	2020-11-04	00:17:15.150000	2	-4.4312	0.00862	16.491	17.233	2.752		67	Yes	Cafe/restaurant	Very	3	Very	A little	A little	Not at all	Neutral	Comfortable	Good	Ok	Moderately
15	C	2020-11-04	00:17:20.560000	1	-4.2034	0.00886	13.381	14.153	2.704		67.69	No	Cafe/restaurant	Very	3	Very	A little	A little	Moderately	Neutral
15	C	2020-11-11	00:14:46.420000	2	-3.751	0.00666	9.519	10.772	2.647		62.69	Yes	Cafe/restaurant	Very	1	Moderately	Most of it	Very	A little	Neutral	Comfortable	Good	Poor	Not at all
15	C	2020-11-20	00:19:27.040000	2	-3.8982	0.01015	15.422	15.057	3.83		64.22	Yes	Cafe/restaurant	Moderately	2	A little	All of it	Very	Not at all	Very happy	Comfortable	Ok	Very poor	Not at all
15	C	2020-11-20	00:19:44.510000	1	-3.9723	0.00747	16.011	15.414	3.596		67	No	Cafe/restaurant	Moderately	2	A little	All of it	Very	Not at all	Very happy
15	C	2020-11-21	00:20:35.060000	2	-4.2853	0.01567	18.509	19.094	3.247		71.7	Yes	Cafe/restaurant	A little	2	A little	All of it	Very	Not at all	Very happy	Comfortable	Very good	Very poor	Not at all
15	C	2020-12-01	00:10:23.500000	2	-3.5683	0.02499	11.077	16.142	2.539		58.62	Yes	Cafe/restaurant	Moderately	2	Moderately	All of it	Very	A little	Neutral	Comfortable	Good	Poor	Not at all
15	C	2020-12-08	00:18:58.510000	2	-4.4274	0.01537	16.693	18.32	2.941		70.38	Yes	Cafe/restaurant	Moderately	2	Moderately	Most of it	Very	Not at all	Happy	Comfortable	Good	Very poor	Not at all
15	C	2020-12-08	00:19:25.320000	1	-4.0523	0.01308	15.25	15.835	3.625		69.69	No	Cafe/restaurant	Moderately	2	Moderately	Most of it	Moderately	A little	Happy
15	C	2020-12-08	00:19:44.250000	2	-4.4103	0.01734	18.57	19.162	2.96		69.91	Yes	Cafe/restaurant	Moderately	1	Moderately	Most of it	Very	A little	Happy	Comfortable	Good	Very poor	Not at all
15	C	2020-12-10	00:13:14	2	-4.1325	0.01083	14.959	15.486	3.434		69.42	Yes	Cafe/restaurant	Moderately	2	Moderately	Most of it	Moderately	Moderately	Neutral	Comfortable	Ok	Very poor	Not at all
15	C	2021-01-12	00:19:41.210000	2	-3.6461	0.00586	12.329	12.038	3.527		72.89	Yes	Cafe/restaurant	Moderately	2	Moderately	Most of it	Moderately	Not at all	Happy	Comfortable	Good	Poor	Not at all
16	C	2020-03-09	00:15:24.050000	1								No	Other	Not at all	2	Not at all	All of it	Extremely	Not at all	Happy
16	C	2020-03-09	00:18:51.510000	1								No	Shopping centre	Moderately	3	A little	Most of it	Very	Not at all	Happy
16	C	2020-06-03	00:20:29.250000	1								No	Shopping centre	Moderately	1	A little	Most of it	Moderately	Not at all	Happy
16	C	2020-06-05	00:17:33.140000	1								No	Shopping centre	Moderately	1	Not at all	Most of it	A little	A little	Neutral
16	C	2020-06-06	00:16:53.430000	1								No	Shopping centre	Moderately	1	A little	Most of it	Moderately	Not at all	Happy
16	C	2020-07-11	00:16:32.240000	1	-5.2727	0.02344	49.704	46.959	4.493		57.31	No	Shopping centre	Moderately	2	A little	Most of it	Moderately	Not at all	Happy
16	C	2020-07-14	00:17:58.280000	1	-5.8937	0.01647	54.46	48.881	4.355		66.63	No	Shopping centre	Moderately	2	Moderately	About half	Moderately	Moderately	Happy
16	C	2020-07-14	00:19:26.370000	1	-3.5775	0.01616	39.646	34.002	5.81		52.7	No	Shopping centre	A little	1	A little	Most of it	Moderately	A little	Happy
16	C	2020-07-15	00:20:26.260000	1	-4.2441	0.01911	55.928	47.267	5.697		52.09	No	Shopping centre	Moderately	1	Moderately	Most of it	Moderately	A little	Happy
16	C	2020-07-18	00:17:54.010000	1	-5.0192	0.01943	44.381	40.229	5.133		56.93	No	Shopping centre	Moderately	1	A little	Most of it	Very	A little	Happy
16	C	2020-08-01	00:14:38.160000	1	-3.3442	0.00575	9.808	11.252	2.74		64.79	No	Shopping centre	Very	2	Moderately	A little	Moderately	A little	Happy
16	C	2020-08-08	00:17:24.180000	1	-5.3568	0.02357	41.241	40.012	3.636		53.99	No	Shopping centre	Moderately	1	Moderately	Most of it	Moderately	A little	Happy
16	C	2020-08-15	00:16:58.030000	1	-5.1597	0.02235	31.805	32.152	3.15		53.4	No	Shopping centre	Very	1	Moderately	Most of it	Moderately	Not at all	Happy
16	C	2020-08-22	00:16:57.570000	1	-4.8562	0.01584	29.527	31.42	2.933		54.86	No	Shopping centre	Moderately	2	Moderately	Most of it	Moderately	Moderately	Neutral
16	C	2020-09-19	00:16:59.510000	1	-5.2765	0.02771	37.053	37.088	3.009		53.07	No	Shopping centre	Moderately	2	Moderately	Most of it	Moderately	Moderately	Neutral
16	C	2020-10-03	00:18:16.100000	1	-4.6108	0.01382	27.247	27.249	4.94		58.26	No	Shopping centre	Moderately	1	Moderately	Most of it	A little	A little	Neutral
16	C	2020-10-17	00:17:08.310000	1	-4.6563	0.01571	24.562	25.187	3.131		53.18	No	Shopping centre	Moderately	2	Moderately	Most of it	Moderately	A little	Happy
16	C	2020-10-27	00:18:42.280000	2	-2.9921	0.00012	7.774	6.536	5.038		84.53	Yes	Shopping centre	Very	1	A little	Most of it	Moderately	A little	Happy	Comfortable	Ok	Ok	Moderately
16	C	2020-10-28	00:18:58.060000	2	-4.6579	0.00041	21.906	19.138	3.266		78.46	Yes	Shopping centre	Very	1	Moderately	Most of it	Moderately	A little	Happy	Loud but ok	Ok	Ok	A little
16	C	2020-11-04	00:16:19.390000	2	-4.5978	0.00042	20.721	18.144	3.468		79.82	Yes	Shopping centre	Moderately	1	Moderately	Most of it	A little	A little	Neutral	Comfortable but slightly loud	Ok	Ok	Moderately
16	C	2020-11-13	00:21:48.180000	2	-4.2245	0.00118	14.134	13.299	3.022		55.44	Yes	Shopping centre	Moderately	1	Moderately	Most of it	Moderately	A little	Neutral	Loud but ok	Ok	Ok	A little
16	C	2020-11-18	00:18:43.480000	2	-4.1095	0.0017	13.719	12.978	3.038		52.25	Yes	Shopping centre	Moderately	1	Moderately	Most of it	Moderately	A little	Neutral	Comfortable but slightly loud	Ok	Ok	A little
16	C	2020-11-24	00:21:58.290000	2	-3.9312	0.00046	12.787	12.062	4.362		65.29	Yes	Shopping centre	Moderately	1	Moderately	Most of it	Moderately	A little	Neutral	Comfortable but slightly loud	Ok	Ok	Moderately
16	C	2020-12-03	00:20:50.180000	2	-4.0516	0.00127	13.753	13.001	3.399		55.64	Yes	Shopping centre	Moderately	1	Moderately	About half	Moderately	A little	Neutral	Loud but ok	Ok	Ok	Moderately
17	E	2020-03-04	00:09:58.030000	1								No	Other	Not at all	1	Not at all	All of it	Extremely	Not at all	Happy
17	E	2020-03-09	00:18:42.480000	1								No	Other	Very	1	Moderately	Most of it	Very	Not at all	Happy
17	E	2020-03-09	00:18:43.420000	1								No	Cafe/restaurant	Very	3	Very	Most of it	Moderately	Moderately	Neutral
17	E	2020-03-13	00:17:15.360000	1								No	Bar/pub	Very	1	Moderately	Most of it	Very	Moderately	Neutral
17	E	2020-06-30	00:20:47.450000	1	-3.4781	0.02364	20.446	19.01	5.888		61.48	No	Cafe/restaurant	Moderately	3	Moderately	Most of it	Moderately	A little	Happy
17	E	2020-07-13	00:16:49.340000	1	-4.1501	0.0815	20.763	26.483	3.046		38.2	No	Party or gathering at a home	Moderately	2	Moderately	About half	Moderately	Moderately	Neutral
17	E	2020-10-31	00:10:20.210000	1	-3.6739	0.02982	13.694	15.827	3.636		47.21	No	Shopping centre	Moderately	1	Moderately	Most of it	Very	Not at all	Happy
17	E	2020-11-15	00:08:05.210000	2	-3.429	0.03084	10.714	15.527	2.631		41.35	Yes	Cafe/restaurant	Extremely	2	Very	Most of it	Very	Moderately	Happy	Comfortable	Good	Good	Very
17	E	2020-11-20	00:10:40.160000	2	-3.733	0.00887	15.139	13.912	3.674		76.65	Yes	Cafe/restaurant	Moderately	2	Moderately	All of it	Extremely	Not at all	Happy	Comfortable	Very good	Very good	Extremely
17	E	2020-12-03	00:09:23.140000	2	-3.205	0.02339	7.494	12.169	2.615		38.79	Yes	Cafe/restaurant	Moderately	2	Not at all	All of it	Extremely	Not at all	Happy	Comfortable	Very good	Very good	Very
18	C	2020-07-15		1	-4.32224	0.0197476	24.3318	24.6584	3.54574	-2.59632	75.1083	No	Café/restaurant	Extremely	1	Moderately	All of it	Moderately	A little	Very happy
18	C	2020-10-17		1	-4.52779	0.0203034	26.5957	26.0299	3.56258	-2.22731	82.3212	No	Café/restaurant	Extremely	3	Extremely	About half	Moderately	A little	Happy
18	C	2020-10-21		1	-4.58524	0.0255567	21.7966	23.7605	2.99434	-2.4706	75.109	No	Café/restaurant	Very	1	Moderately	Most of it	Very	A little	Happy
18	C	2020-11-27		2	-4.63289	0.031261	30.7084	29.2632	3.69621	-2.28128	79.9621	Yes	Bar/pub	Very	3	Moderately	Most of it	Extremely	Not at all	Very happy	Comfortable	Good	Good	Very
18	C	2020-11-28		2	-4.02019	0.0193727	27.3154	25.874	5.13236	-2.77396	72.2558	Yes	Party or gathering at home	Moderately	3	A little	All of it	Extremely	Not at all	Very happy	Comfortable	Good	Good	Very
18	C	2020-12-12		2	-4.25549	0.0196431	23.746	24.0137	4.43988	-2.3144	80.4716	Yes	Café/restaurant	Very	3	A little	Most of it	Very	Not at all	Very happy	Comfortable	Good	Good	Very
18	C	2020-12-14		2	-4.34582	0.0215159	21.3895	21.3428	3.88934	-2.48231	76.5977	Yes	Café	Moderately	2	Not at all	All of it	Very	Not at all	Happy	Comfortable	Good	Good	Very
18	C	2020-12-21		2	-3.95453	0.017429	26.7658	26.0558	4.35149	-3.02149	67.7692	Yes	Party or gathering at home	Moderately	2	A little	Most of it	Extremely	Not at all	Very happy	Comfortable	Good	Good	Very
20	C	2020-06-03	00:15:41.480000	1								No	Party or gathering at a home	Moderately	1	Moderately	Most of it	Very	Moderately	Very happy
20	C	2020-06-30	00:12:32.500000	1	-3.7027	0.02277		14.746	7.775		57.72	No	Other	Not at all	2	Very	About half	Moderately	A little	Happy
22	E	2020-03-12		1	-2.78854	0.0244092	18.4752	33.6622	3.9403	-3.46835	40.9058	No	Other	Not at all	1	Not at all	All of it	Extremely	Not at all	Very happy
22	E	2020-03-14		1	-3.96718	0.00602966	18.5335	19.4833	2.92505	-2.02664	79.1767	No	Cafe/restaurant	Extremely	3	Extremely	A little	A little	Very	Sad
23	C	2020-06-22		1	-3.77649	0.0418948	24.5893	30.8659	4.07143	-3.05325	45.767	No	Other	A little	1	Moderately	Most of it	Moderately	Moderately	Happy
23	C	2019-01-23		2	-1.58725	0.000100825	2.21392	1.74037	2.88031	-2.79693	65.6651	Yes	Café/restaurant	A little	2	A little	All of it	Very	Not at all	Happy	Comfortable	Good	Poor	A little
23	C	2018-12-25		2	-4.03232	0.0268375	20.2441	22.4961	3.09145	-3.0607	52.0536	Yes	Other	Moderately	1	A little	Most of it	Moderately	Not at all	Happy	Loud but ok	Good	Poor	A little
23	C	2018-12-27		2	-3.68805	0.0535834	19.5609	30.3344	3.35582	-3.20037	39.6307	Yes	Café/restaurant	A little	2	Not at all	All of it	Extremely	Not at all	Very happy	Comfortable	Very good	Ok	A little
25	E	2020-06-16	00:11:13	1								No	Party or gathering at a home	Moderately	2	Moderately	Most of it	Very	Not at all	Happy
25	E	2020-07-28	00:15:30	1	-2.5957	0.00802	4.643	6.102	2.749		43.65	No	Party or gathering at a home	Moderately	2	Moderately	About half	Very	Moderately	Happy
25	E	2020-08-11	00:13:06.360000	1	-2.745	0.02249	9.124	12.385	2.892		44.11	No	Party or gathering at a home	Moderately	2	Extremely	About half	Moderately	Moderately	Happy
25	E	2020-09-22	00:10:18.080000	1	-3.4193	0.01503	12.534	13.59	2.906		77.09	No	Cafe/restaurant	Moderately	2	Very	Most of it	Moderately	Moderately	Happy
25	E	2020-11-24	00:11:41.450000	2	-3.135	0.00266	7.248	7.82	2.547		69.72	Yes	Party or gathering at a home	Very	3	A little	Most of it	Extremely	A little	Happy	Comfortable but slightly loud	Very good	Ok	Moderately
25	E	2020-12-01	00:11:57.260000	2	-3.4824	0.01397	10.273	12.798	2.585		66.84	Yes	Shopping centre	Moderately	2	A little	Most of it	Extremely	Not at all	Happy	Comfortable but slightly loud	Good	Ok	Moderately
25	E	2021-01-14	00:15:34.080000	2	-1.878	0.00824	4.349	4.985	2.51		39.24	Yes	Other	A little	2	Not at all	All of it	Extremely	Not at all	Happy	Comfortable but slightly loud	Good	Ok	Very
26	E	2020-09-23		1	-4.17165	0.00890069	16.5027	16.8456	3.1799	-2.20854	77.0465	No	Cafe/restaurant	Very	2	Very	About half	Moderately	A little	Happy
26	E	2020-10-03		1	-2.61936	0.00302339	7.15339	8.09897	3.09472	-2.28451	74.62	No	Bar/pub	Moderately	2	Not at all	All of it	Extremely	Not at all	Very happy
28	E	2020-11-18	00:12:02	1	-3.6049	0.014	12.911	12.85	3.466		71.33	No	Cafe/restaurant	Moderately	1	A little	Most of it	Extremely	Not at all	Very happy
28	E	2020-11-18	00:12:25.300000	1	-3.8279	0.03306	19.023	18.45	4.189		77.42	No	Cafe/restaurant	Very	1	Very	Most of it	Very	Not at all	Very happy
28	E	2020-11-19	00:13:58.480000	1	-2.3893	0.01039	5.987	7.713	2.617		54.67	No	Shopping centre	Moderately	1	Very	Most of it	Very	A little	Happy
28	E	2020-11-19	00:18:55.450000	1	-4.0473	0.02049	11.59	14.315	2.556		72.69	No	Shopping centre	Very	1	Very	About half	Moderately	Very	Neutral
28	E	2020-11-20	00:15:03.500000	1	-3.8442	0.0122	12.835	12.78	3.251		72.3	No	Bar/pub	Very	2	Very	About half	Moderately	Very	Neutral
28	E	2020-11-22	00:10:29.220000	2	-3.5973	0.01382	11.891	13.769	2.741		69.47	Yes	Cafe/restaurant	Very	1	Very	All of it	Extremely	Not at all	Very happy	Comfortable	Very good	Good	Very
28	E	2020-11-23	00:16:23.440000	2	-4.1516	0.0416	14.519	18.443	2.664		66.87	Yes	Cafe/restaurant	Extremely	1	Extremely	Most of it	Very	Not at all	Very happy	Loud but ok	Ok	Ok	Moderately
28	E	2020-11-26	00:12:37.030000	2	-4.5685	0.02885	19.164	20.152	3.049		75.9	Yes	Cafe/restaurant	Extremely	1	Very	All of it	Extremely	Not at all	Very happy	Comfortable	Very good	Very good	Very
28	E	2020-12-01	00:09:50.230000	2	-4.3246	0.0572	22.577	26.35	3.289		71.35	Yes	Cafe/restaurant	Extremely	1	Extremely	All of it	Extremely	A little	Happy	Comfortable but slightly loud	Good	Ok	Very
28	E	2020-12-05	00:15:08.140000	2	-3.8671	0.03003	12.845	17.62	2.524		68.04	Yes	Cafe/restaurant	Extremely	1	Extremely	All of it	Extremely	Not at all	Very happy	Comfortable but slightly loud	Good	Good	Very
28	E	2020-12-06	00:11:55.340000	2	-4.1108	0.01211	12.881	13.977	2.624		70.98	Yes	Cafe/restaurant	Very	1	Very	All of it	Extremely	A little	Happy	Comfortable	Very good	Ok	Very
28	E	2020-12-12	00:12:34.180000	2	-3.2832	0.00425	7.486	7.802	2.654		64.43	Yes	Cafe/restaurant	Very	1	Moderately	All of it	Extremely	Not at all	Very happy	Comfortable but slightly loud	Good	Good	Very
28	E	2020-12-20	00:15:04.270000	2	-3.8946	0.02454	12.405	14.992	2.466		68.19	Yes	Cafe/restaurant	A little	1	A little	All of it	Extremely	Not at all	Very happy	Comfortable	Good	Good	Very
28	E	2020-12-30	00:10:19.520000	2	-3.2108	0.01203	8.642	9.757	2.379		72.79	Yes	Cafe/restaurant	Very	1	Very	All of it	Very	Not at all	Very happy	Uncomfortably loud	Very good	Good	Very
28	E	2021-01-03	00:12:35.490000	2	-3.6889	0.00557	10.842	12.264	2.625		68.97	Yes	Cafe/restaurant	Very	1	Moderately	Most of it	Very	Not at all	Very happy	Loud but ok	Very good	Good	Very
28	E	2021-01-09	00:15:17.080000	2	-3.3529	0.01462	8.453	10.776	2.539		62.95	Yes	Cafe/restaurant	A little	1	Very	All of it	Extremely	A little	Very happy	Comfortable	Very good	Ok	Very
28	E	2021-01-10	00:12:05.530000	2	-3.7956	0.01902	10.819	13.54	2.591		66.3	Yes	Cafe/restaurant	Very	1	Extremely	All of it	Extremely	Not at all	Very happy	Comfortable but slightly loud	Good	Good	Very
28	E	2021-01-24	00:10:27.160000	2	-4.49	0.01946	19.101	18.765	2.901		83.92	Yes	Cafe/restaurant	Extremely	1	Extremely	A little	Moderately	Very	Very sad	Uncomfortably loud	Ok	Ok	Moderately
34	C	2020-08-19		1	-4.334	0.020335	20.367	22.3151	3.48999	-2.69199	72.6011	No	Bar/pub	Very	3	Very	About half	Moderately	Moderately	Sad
34	C	2020-08-23		1	-3.59229	0.0245007	16.1714	20.6499	3.91789	-3.27647	59.1038	No	Shopping centre	Moderately	2	Moderately	About half	Moderately	Moderately	Neutral
34	C	2020-08-27		1	-5.13641	0.0581381	37.019	35.4772	3.02761	-2.57474	71.8322	No	Other	Extremely	3	Very	About half	Moderately	Moderately	Neutral
34	C	2020-09-19		1	-2.37981	0.0154235	9.1222	11.9165	2.65116	-3.5225	50.1667	No	Other	A little	2	Moderately	About half	Moderately	Moderately	Neutral
41	E	2020-08-11	10:14am	1	-3.85051	0.0249656	16.0754	20.6657	5.03393	-2.71322	74.0149	No	Café/restaurant	Moderately	1	A little	Most of it	Moderately	A little	Neutral
41	E	2020-08-11	10:28am	1	-4.17829	0.0332588	25.0371	32.2347	3.18561	-2.64286	69.7129	No	Café/restaurant	Moderately	2	Moderately	Most of it	Moderately	Moderately	Neutral
41	E	2020-08-12		1	-4.0898	0.0168243	30.3748	28.2817	4.82801	-2.7608	74.5974	No	Other	Very	3	Very	About half	Moderately	Very	Sad
41	E	2020-08-14		1	-3.48898	0.0139979	18.6017	20.2319	3.92612	-3.43841	57.4797	No	Other	Moderately	1	Moderately	About half	Moderately	Moderately	Sad
41	E	2020-09-23		1	-3.70213	0.00858908	19.3579	18.9775	3.28677	-3.01776	70.0696	No	Café/restaurant	Very	1	Very	About half	Moderately	Very	Sad
41	E	2020-08-27		1	-2.1492	0.00145481	3.77778	4.54241	2.24644	-3.21413	64.1164	No	Other	Moderately	1	Very	About half	Moderately	Moderately	Sad
41	E	2020-08-29		1	-3.79729	0.00973193	16.0341	16.9065	3.46759	-2.59289	76.7468	No	Other	Very	1	Very	A little	A little	Very	Sad
41	E	2020-09-04		1	-3.8401	0.0172451	22.4487	23.4153	4.17015	-3.15141	63.9891	No	Other	Very	1	Very	About half	A little	Very	Sad
41	E	2020-09-30		1	-4.22488	0.0151353	17.5255	20.0093	2.5483	-2.7102	73.0317	No	Café/restaurant	Moderately	1	Moderately	Most of it	Moderately	Moderately	Neutral
41	E	2020-12-11		2	-4.20502	0.00830317	20.0614	18.7769	3.5038	-2.31999	85.4099	Yes	Café/restaurant	Extremely	3	Extremely	A little	A little	Very	Sad	Comfortable but slightly soft	Ok	Ok	A little
41	E	2020-12-14		2	-3.72774	0.0173634	16.4354	20.4542	3.55261	-2.77876	70.4983	Yes	Café/restaurant	Moderately	3	Moderately	Most of it	Moderately	A little	Neutral	Loud but ok	Good	Good	Moderately
41	E	2020-12-19	6:33pm	2	-2.77233	0.00534256	7.60708	9.48292	2.75319	-3.63673	53.6366	Yes	Café/restaurant	A little	2	A little	Most of it	Very	Not at all	Happy	Comfortable but slightly loud	Ok	Ok	Moderately
41	E	2020-12-19	7:05pm	2	-4.21705	0.0209492	20.6938	24.9917	3.43533	-2.54307	74.9074	Yes	Bar/pub	Very	2	Very	About half	Moderately	Moderately	Neutral	Comfortable but slightly loud	Ok	Ok	Moderately
41	E	2020-12-23		2	-4.51856	0.0229935	21.0378	24.3666	2.90503	-2.66274	72.5258	Yes	Café/restaurant	Very	1	Very	About half	Moderately	Very	Sad	Uncomfortably loud	Poor	Poor	A little
43	E	2020-08-09		1	-1.90339	0.00352585	3.35349	6.16661	2.7201	-2.32805	75.6531	No	Other	Moderately	1	Very	Most of it	Moderately	Moderately	Neutral
43	E	2020-08-12		1	-1.17748	0.000368634	1.76985	1.68065	1.5004	-2.76882	71.5458	No	Other	Extremely	1	Extremely	About half	A little	Moderately	Neutral
43	E	2020-09-05		1	-3.49856	0.00641412	11.042	12.1242	3.21597	-3.38815	62.575	No	Party or gathering at home	Very	2	Extremely	A little	Not at all	Very	Sad
43	E	2020-09-20		1	-4.36324	0.0450489	19.6112	26.1377	3.84111	-2.70249	68.3769	No	Shopping centre	Moderately	1	Very	About half	Moderately	Moderately	Neutral
43	E	2020-11-18		2	-4.35386	0.0243727	24.4043	24.8537	3.5615	-2.34542	80.625	Yes	Bar/pub	Extremely	2	Very	Most of it	Very	Moderately	Neutral	Uncomfortably loud	Good	Ok	Moderately
47	C	2020-08-19	00:14:31.350000	1	-3.6895	0.03497	15.285	18.09	3.203		67.29	No	Cafe/restaurant	Extremely	1	Extremely	All of it	Extremely	Extremely	Very sad
47	C	2020-08-19	00:14:31.550000	1	-3.3926	0.02621	25.525	23.284	5.401		67.63	No	Cafe/restaurant	Extremely	1	Extremely	All of it	Extremely	Extremely	Very sad
47	C	2020-08-21	00:12:53.320000	1	-3.1491	0.00316	6.913	6.961	3.278		65.88	No	Cafe/restaurant	A little	3	Moderately	About half	Moderately	Moderately	Neutral
47	C	2020-08-28	00:11:13.060000	1	-4.2059	0.00396	13.805	12.99	2.624		73.31	No	Shopping centre	Moderately	1	Moderately	Most of it	Moderately	A little	Neutral
47	C	2020-08-28	00:14:30.490000	1	-4.2416	0.00366	12.97	12.306	2.499		71.91	No	Shopping centre	Moderately	1	Very	About half	Moderately	Moderately	Sad
47	C	2020-08-30	00:14:55.220000	1	-3.268	0.01846	11.445	13.747	3.208		60.2	No	Other	Moderately	1	Moderately	Most of it	Moderately	Moderately	Sad
47	C	2020-08-31	00:10:00.020000	1	-4.3121	0.01099	13.048	14.507	2.472		68.25	No	Shopping centre	A little	1	A little	All of it	Very	A little	Happy
47	C	2020-10-06	00:18:41.180000	2	-3.3823	0.03265	12.959	15.169	2.08		43.29	Yes	Cafe/restaurant	Moderately	1	A little	Most of it	Very	Moderately	Neutral	Comfortable	Good	Good	Very
47	C	2020-10-17	00:12:48.500000	2	-4.6948	0.04595	21.733	22.904	3.057		73.06	Yes	Shopping centre	Very	1	Very	About half	Moderately	Very	Sad	Loud but ok	Ok	Ok	Moderately
47	C	2020-10-21	00:14:56.250000	2	-4.4135	0.03782	15.768	18.753	2.66		68.99	Yes	Shopping centre	A little	1	A little	Most of it	Very	Very	Happy	Comfortable	Good	Good	Very
47	C	2020-10-30	00:17:11.370000	2	-3.9565	0.01327	11.612	12.955	2.084		69.23	Yes	Shopping centre	Moderately	1	Moderately	Most of it	Very	Moderately	Happy	Comfortable	Good	Good	Very
47	C	2020-11-04	00:18:02.010000	2	-4.1733	0.03463	14.527	17.791	2.203		69.47	Yes	Shopping centre	Moderately	1	A little	Most of it	Very	A little	Happy	Comfortable	Good	Good	Very
